# Supplementary material for: Differentiating Parkinson’s Disease from Essential Tremor Using Transcranial Sonography: A Systematic Review and Meta-Analysis
Source: PubMed Central journal article supplement — J Parkinsons Dis. 2022 May 24;12(4):1115–23. doi: 10.3233/JPD-213012 (PMC9198761; doi:10.3233/jpd-213012), 2022-05-24
Supplement: jpd-12-jpd213012-s001.pdf [file jpd-12-jpd213012-s001.pdf]

# Supplementary Material

## Differentiating Parkinson's Disease from Essential Tremor Using Transcranial Sonography: A Systematic Review and Meta-Analysis

**Supplementary Figure 1.** Summary receiver operating characteristic curve of TCS analysis. Area under the curve represents accuracy of diagnosis.

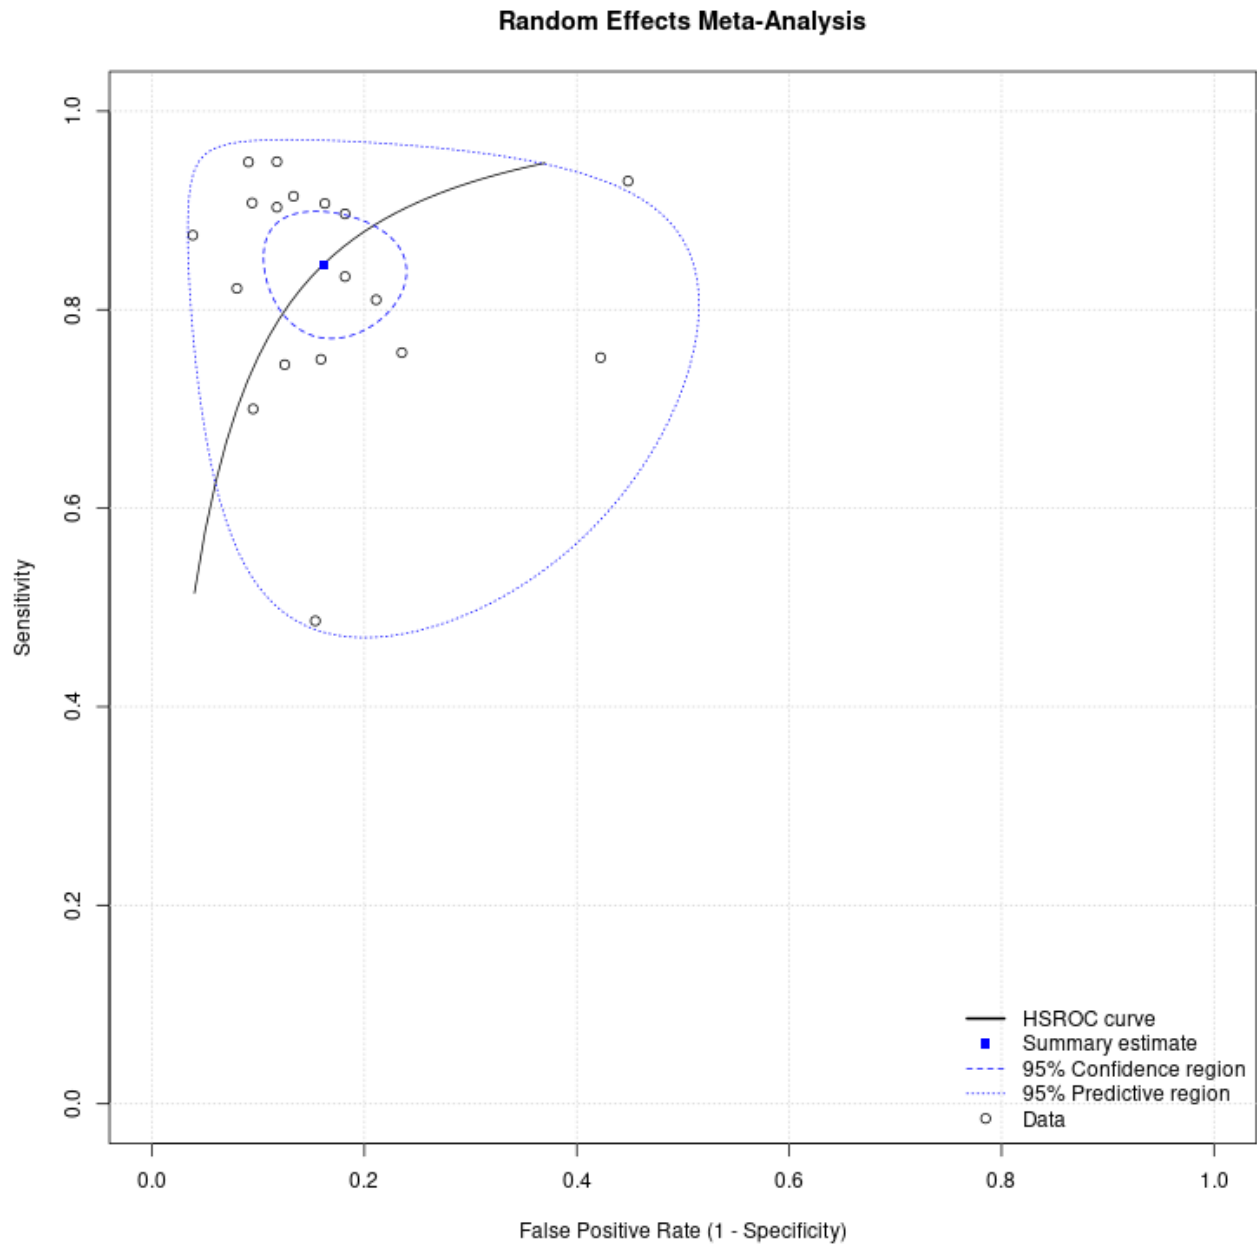

**Supplementary Table 1.** Detailed search strategies.

| <b>Search strategies</b>                                                                                                                    | <b>Results</b> |
|---------------------------------------------------------------------------------------------------------------------------------------------|----------------|
| #1: Search: (benign essential tremors[MeSH Terms])                                                                                          | 2,208          |
| #2: Search: tremor[Title/Abstract]                                                                                                          | 21,213         |
| #3: Search: nigra substantia[MeSH Major Topic]                                                                                              | 8,858          |
| #4 Search: (((echogen*[Title/Abstract]) OR (ultrasound[Title/Abstract])) OR (sonograph*[Title/Abstract])) OR (transcranial[Title/Abstract]) | 345,098        |
| #5: #1 AND #4                                                                                                                               | 188            |
| #6: #2 AND #4                                                                                                                               | 528            |
| #7: #3 OR #4                                                                                                                                | 353,780        |
| #8: #1 AND #7                                                                                                                               | 195            |
| #9: #2 AND #7                                                                                                                               | 651            |
| #10: Search: review[Publication Type]                                                                                                       | 2,863,957      |
| #11: #8 OR #9                                                                                                                               | 661            |
| #12: #11 NOT #10                                                                                                                            | 512            |
